# Supplementary material for: In Silico and In Vitro Studies of 4-Hydroxycoumarin-Based Heterocyclic Enamines as Potential Anti-Tumor Agents
Source: MDPI journal article supplement (doi:10.3390/molecules28155828), 2023-08-02
Supplement: s1 [file s1]

# **In Silico and In Vitro Studies of 4-Hydroxycoumarin-Based Heterocyclic Enamines as Potential Anti-Tumor Agents**

**Mediha Assad <sup>1,2</sup>, Rizwan Nasir Paracha <sup>3</sup>, Abu Bakar Siddique <sup>4</sup>, Muhammad Ashraf Shaheen <sup>4,\*</sup>, Nadeem Ahmad <sup>5</sup>, Muhammad Mustaqeem <sup>4</sup>, Fariha Kanwal <sup>6</sup>, Muhammad Zia Ul Mustafa <sup>4</sup>, Muhammad Fayyaz ur Rehman <sup>4</sup>, Sumaya Fatima <sup>7</sup> and Changrui Lu <sup>\*</sup>**

1 College of Biological Sciences and Medical Engineering, Donghua University, 2999 North Ren Min Road, Shanghai 201620, China

2 Department of Chemistry, Government Graduate Islamia College for Women Cantt Lahore, Lahore 54000, Pakistan

3 Department of Chemistry, Thal University Bhakkar, Bhakkar 30000, Pakistan

4 Institute of Chemistry, University of Sargodha, Sargodha 40100, Pakistan;  
abubakar.siddique@uos.edu.pk (A.B.S.)

5 Department of Pharmacy, Comsats University Islamabad, Lahore Campus, Lahore 54000, Pakistan

6 School of Biomedical Engineering, Shanghai Jiaotong University, Shanghai 200030, China

7 Research Center, The Fourth Hospital of Hebei Medical University, Shijiazhuang 050011, China

\* Correspondence: ashraf.shaheen@uos.edu.pk (M.A.S.); crlu@dhu.edu.cn (C.L.)

**Table S1.** IC<sub>50</sub> values of synthesized compounds (3a-i) by potato disc tumor assay.

| Sample | IC <sub>50</sub> (mg/mL)<br>value | Sample                    | IC <sub>50</sub> (mg/mL)<br>value |
|--------|-----------------------------------|---------------------------|-----------------------------------|
| 3a     | 5±0.5                             | 3f                        | 27.7±3                            |
| 3b     | 37.1±4                            | 3g                        | 1.12±0.2                          |
| 3c     | 2.12±0.3                          | 3h                        | 1.70±0.3                          |
| 3d     | 22.7±3                            | 3i                        | 29.6±4                            |
| 3e     | 2.33±0.2                          | Vinblastine<br>(Standard) | 7.5±0.6                           |

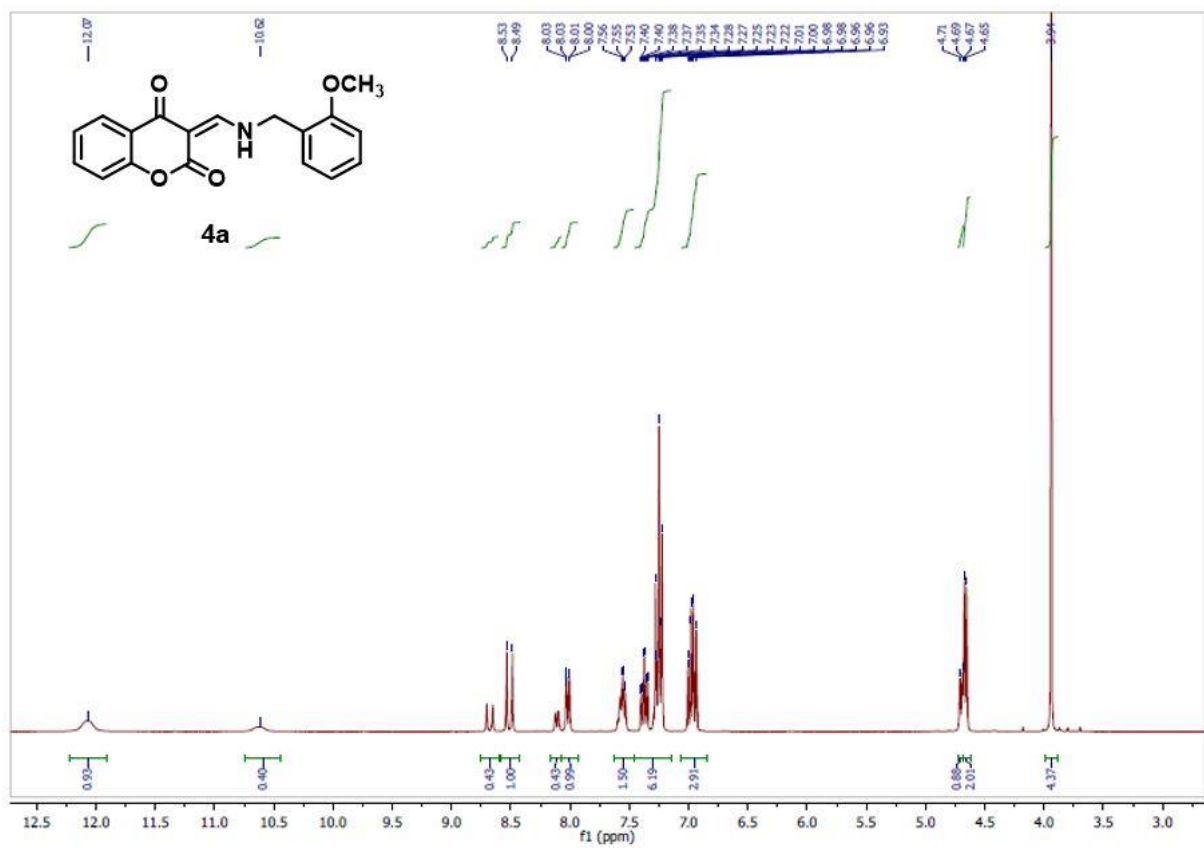

(A)

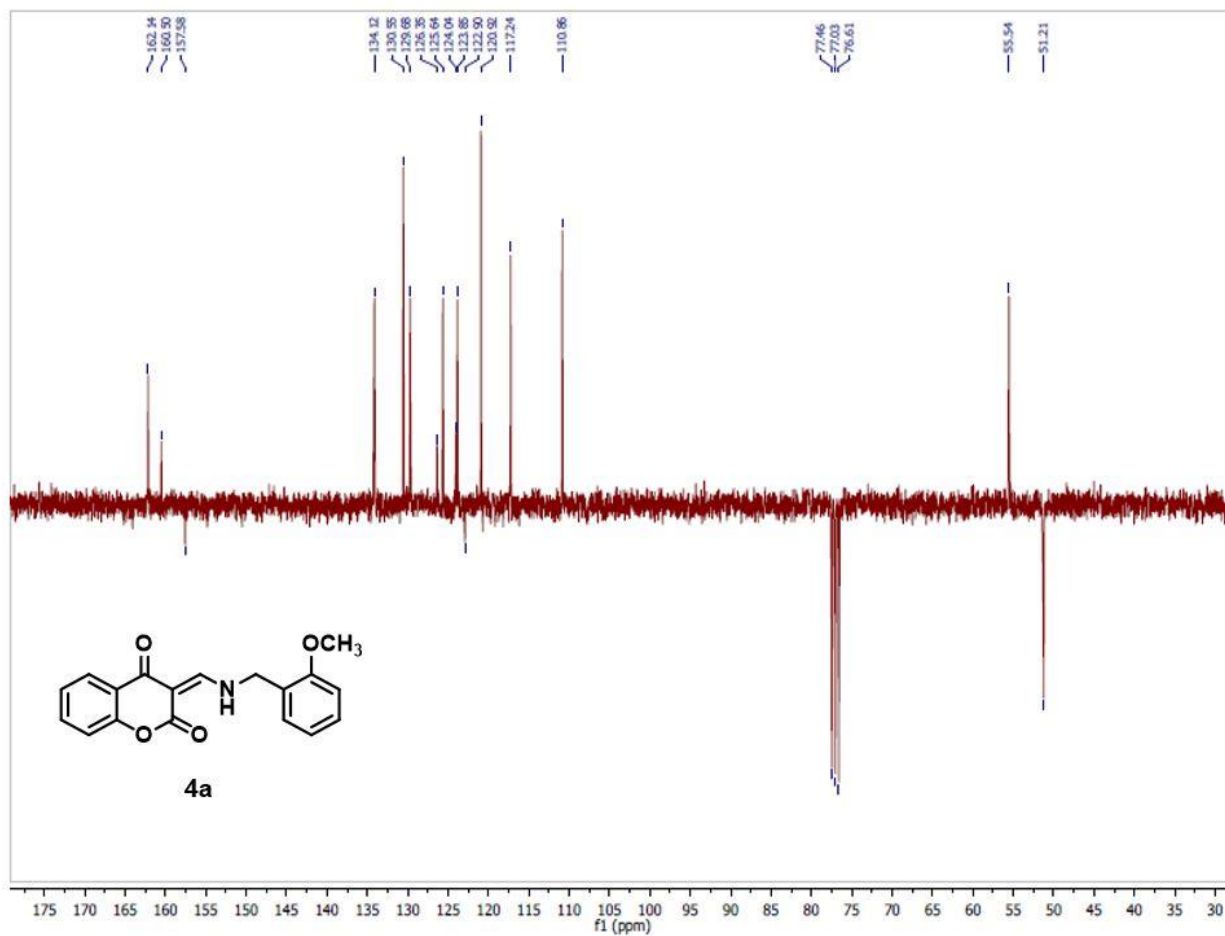

(B)

Figure S1. (A)  $^1\text{H}$ -NMR spectrum of **4a**. (B)  $^{13}\text{C}$ -NMR spectrum of **4a**.

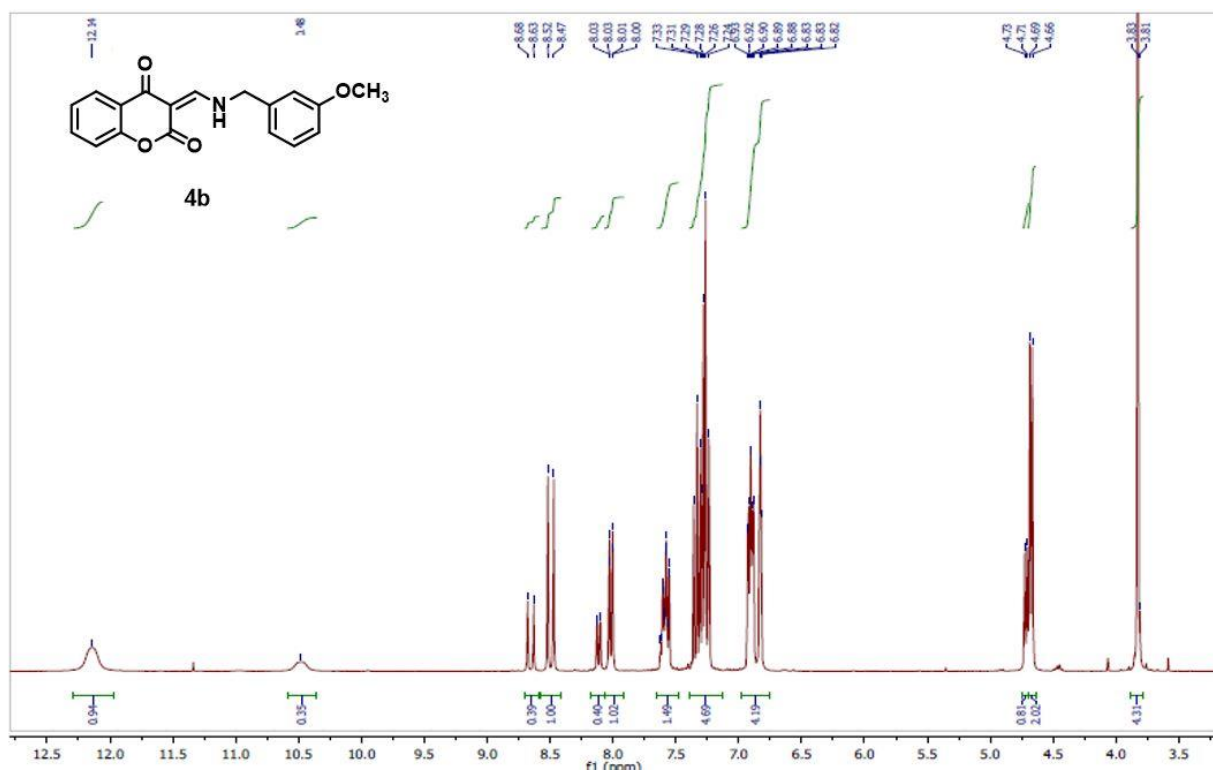

(A)

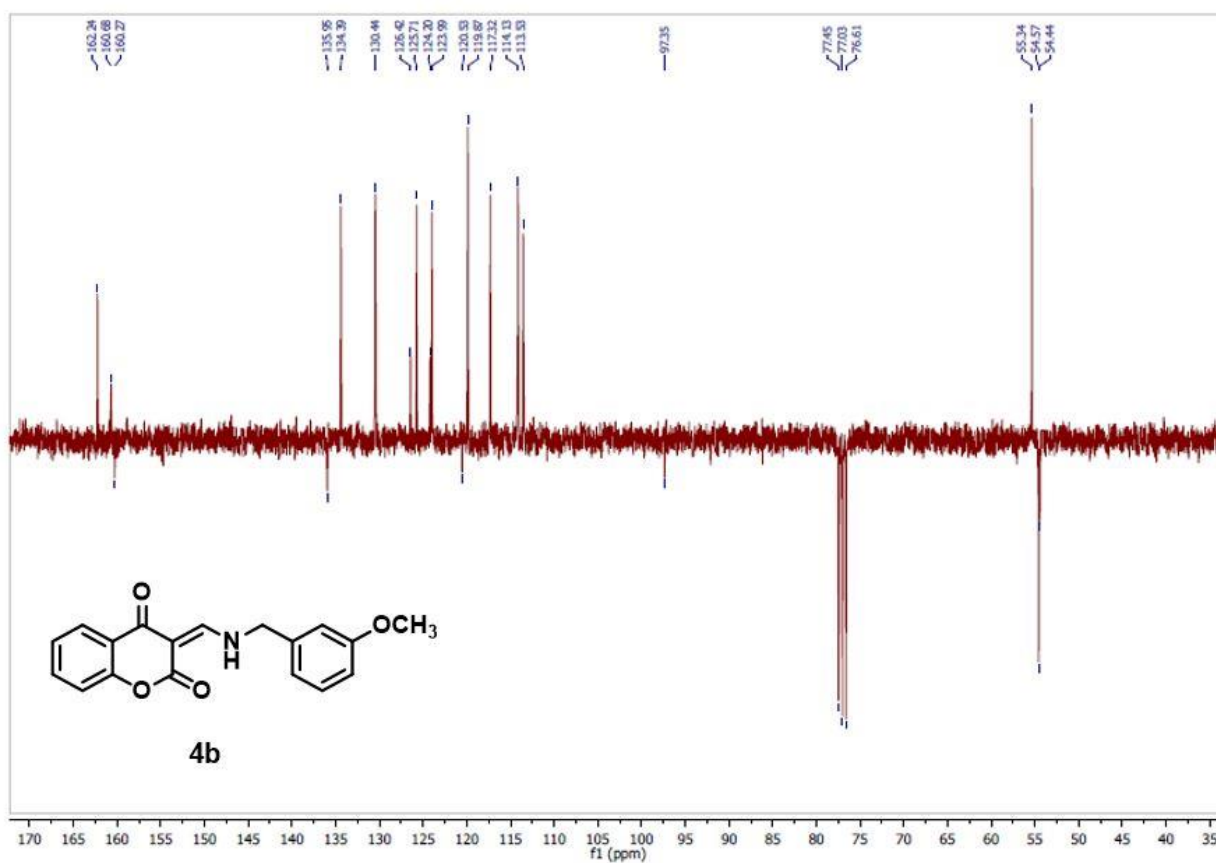

(B)

**Figure S2.** (A)  $^1\text{H}$ -NMR spectrum of **4b**. (B)  $^{13}\text{C}$ -NMR spectrum of **4b**.

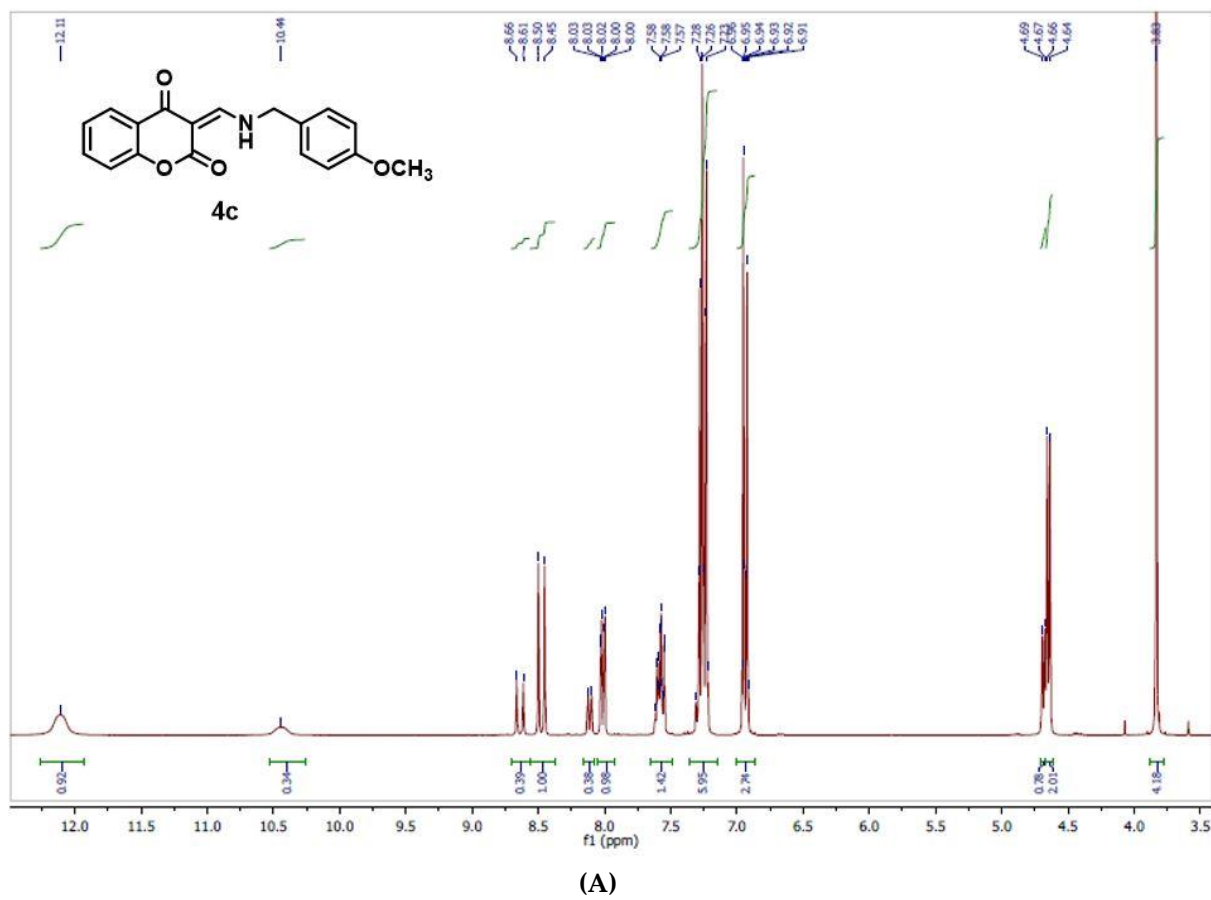

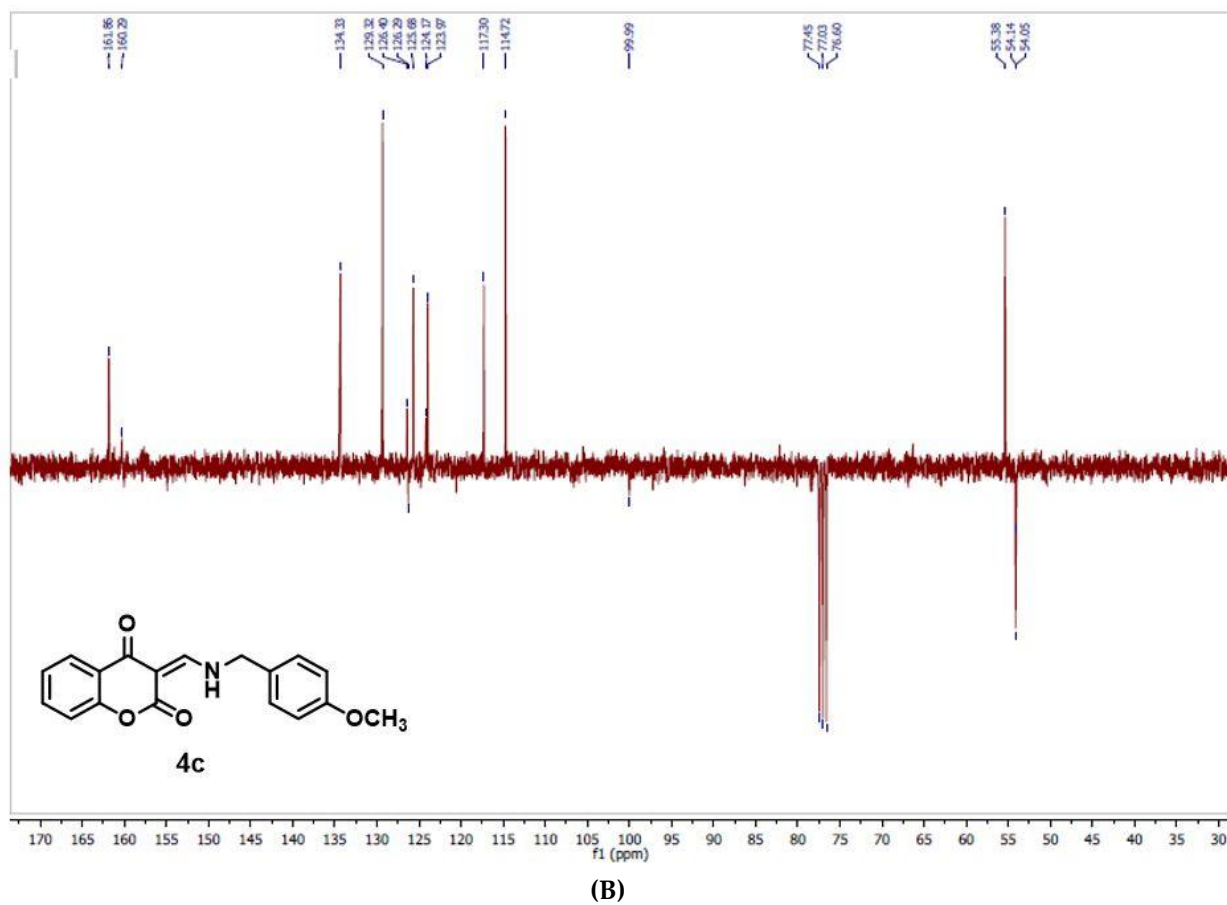

**Figure S3.** (A) <sup>1</sup>H-NMR spectrum of **4c**. (B) <sup>13</sup>C-NMR spectrum of **4c**.

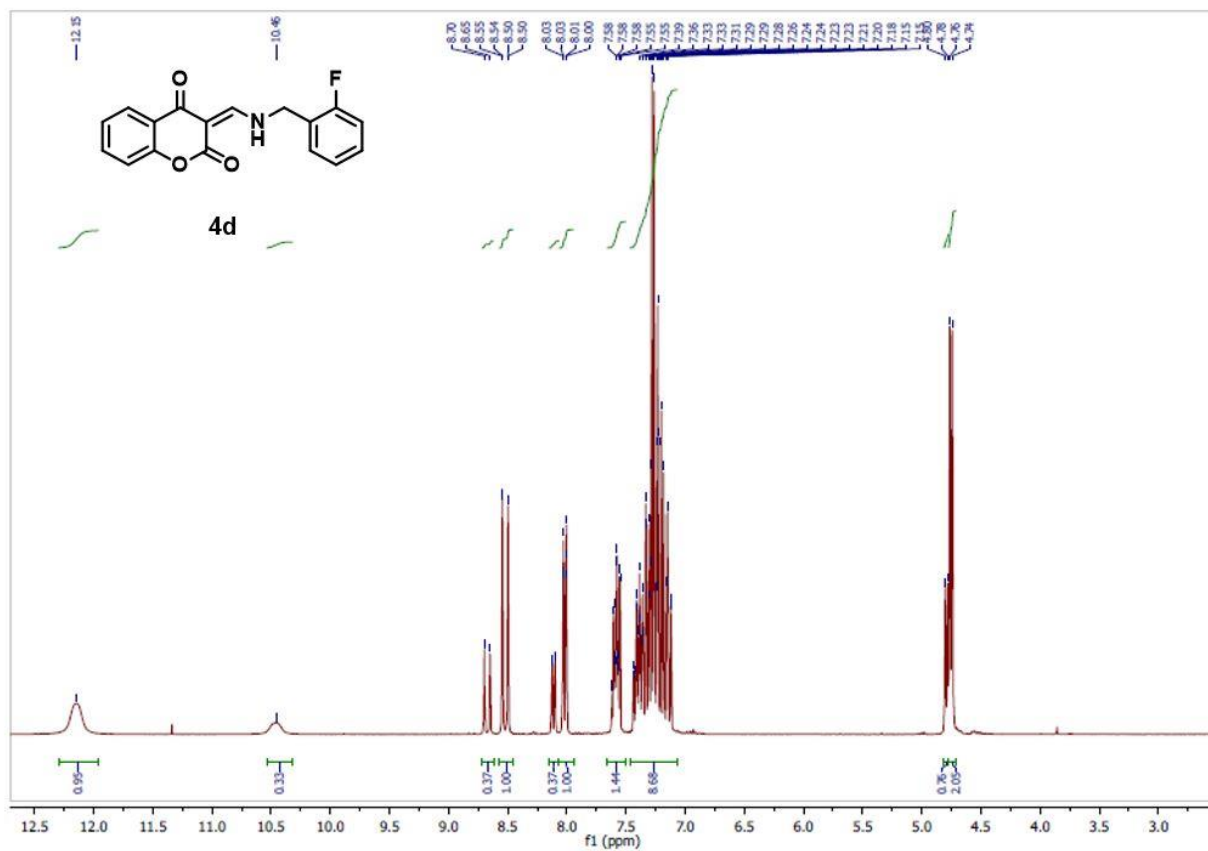

(A)



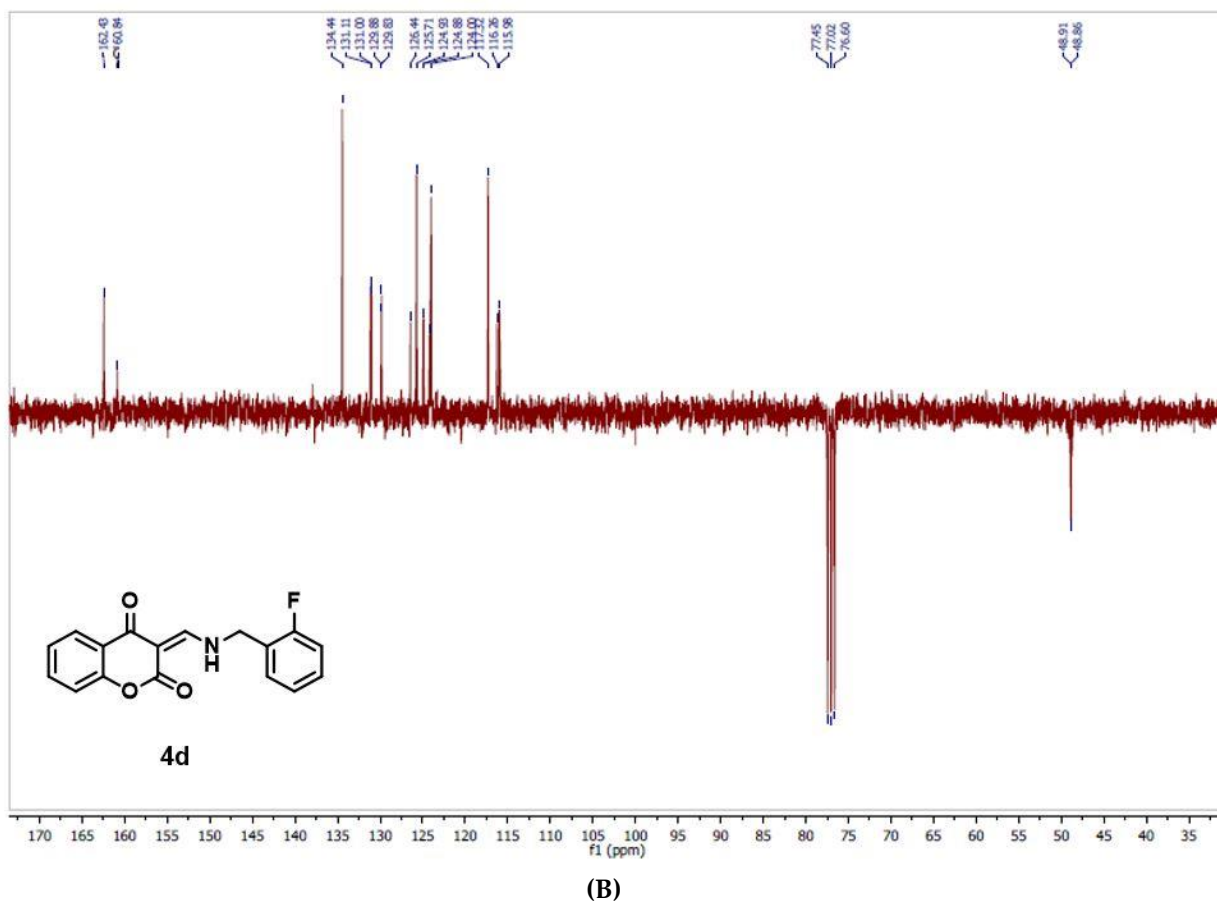

**Figure S4.** (A)  $^1\text{H}$ -NMR spectrum of **4d**. (B)  $^{13}\text{C}$ -NMR spectrum of **4d**.

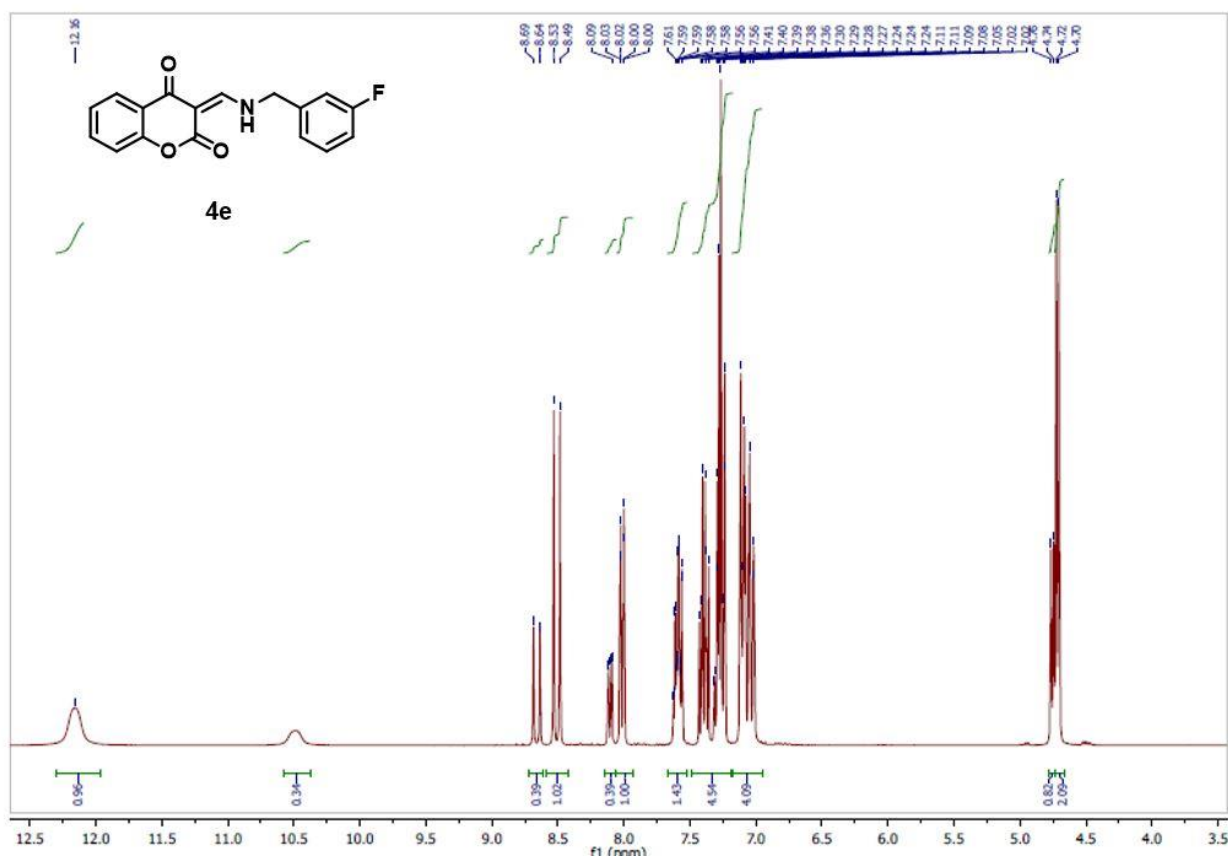

(A)

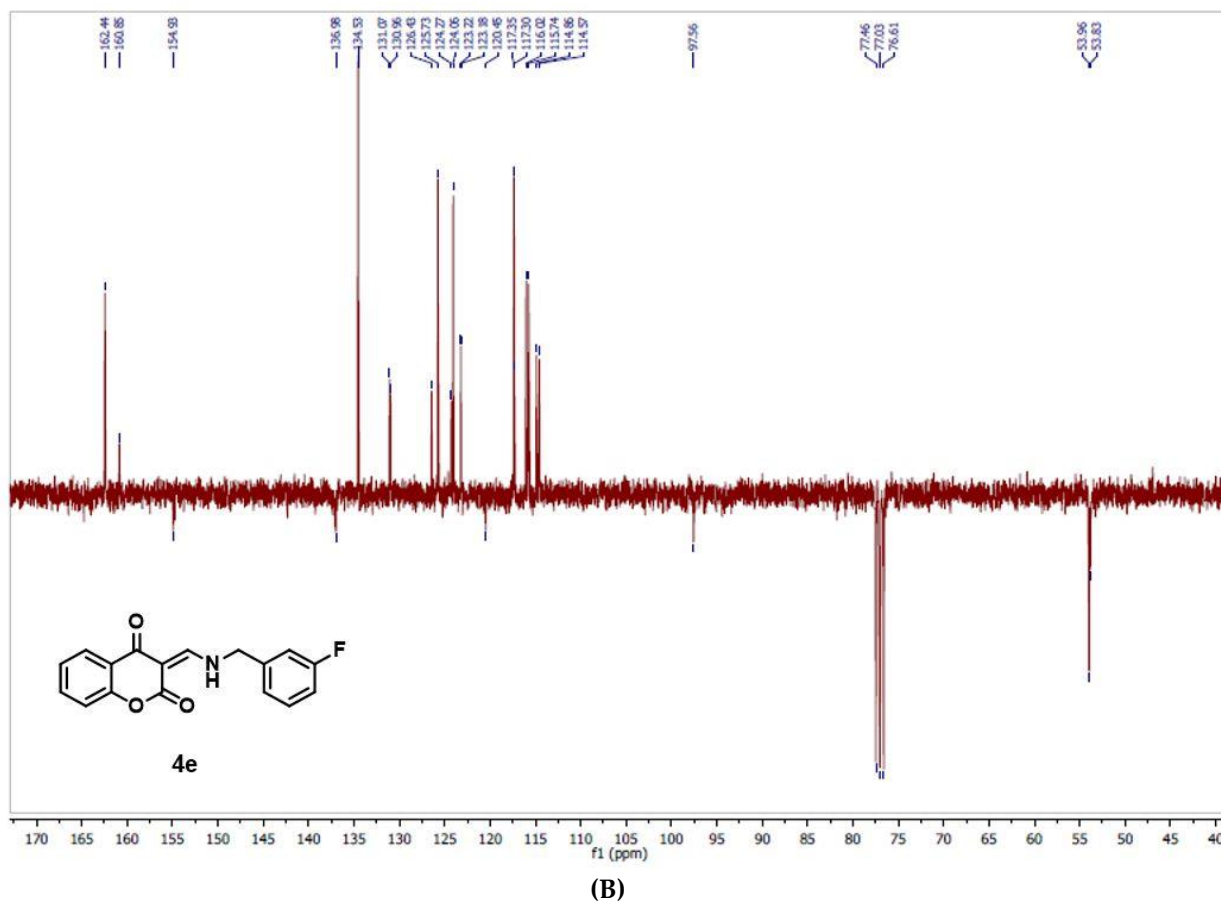

**Figure S5.** (A) <sup>1</sup>H-NMR spectrum of **4e**. (B) <sup>13</sup>C-NMR spectrum of **4e**.

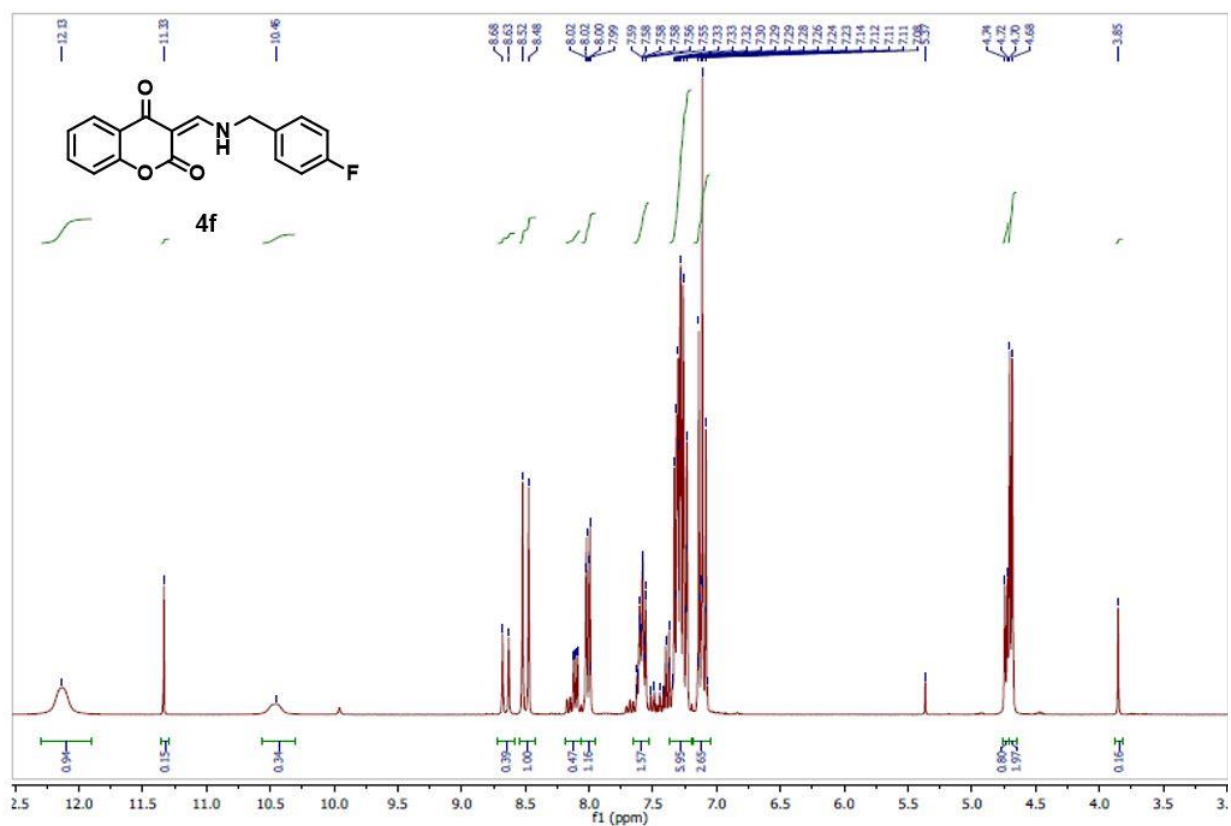

(A)

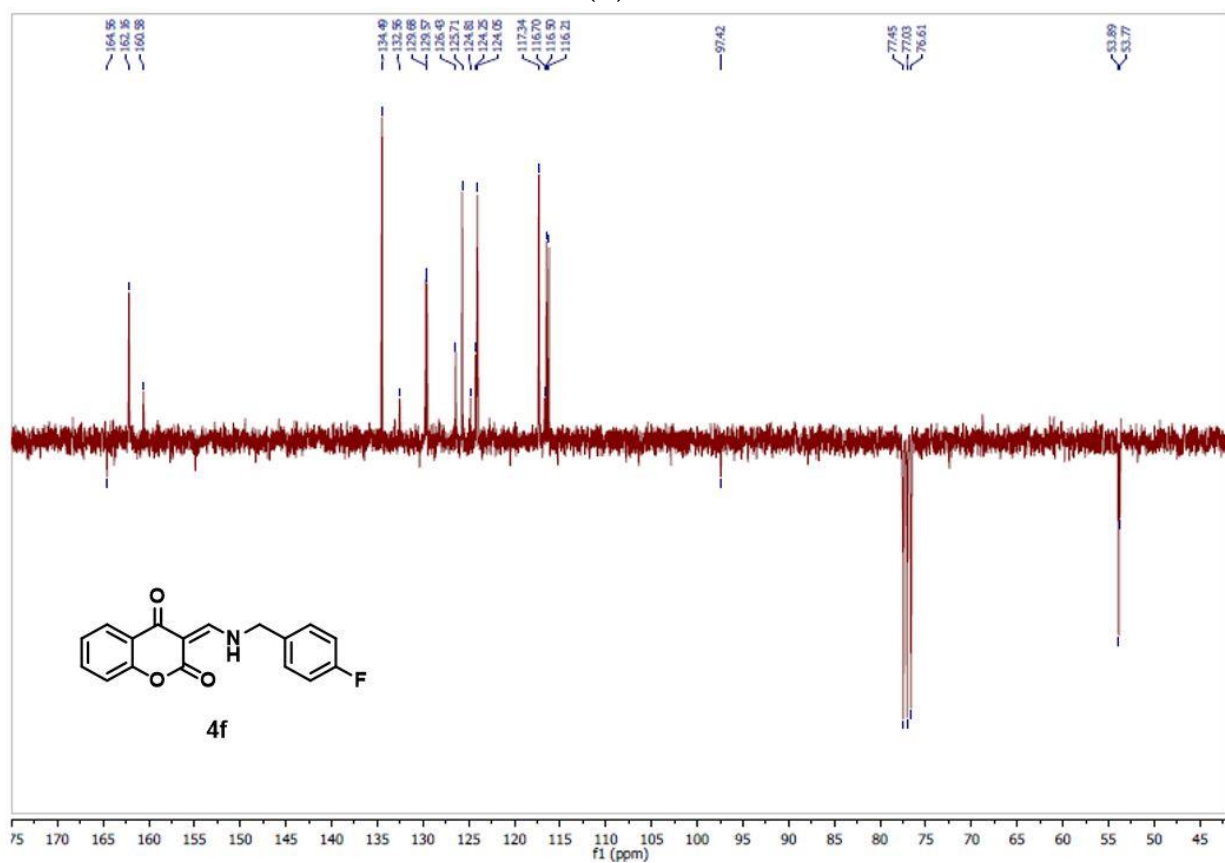

**(B)**

**Figure S6.** (A)  $^1\text{H}$ -NMR spectrum of **4f**. (B)  $^{13}\text{C}$ -NMR spectrum of **4f**.

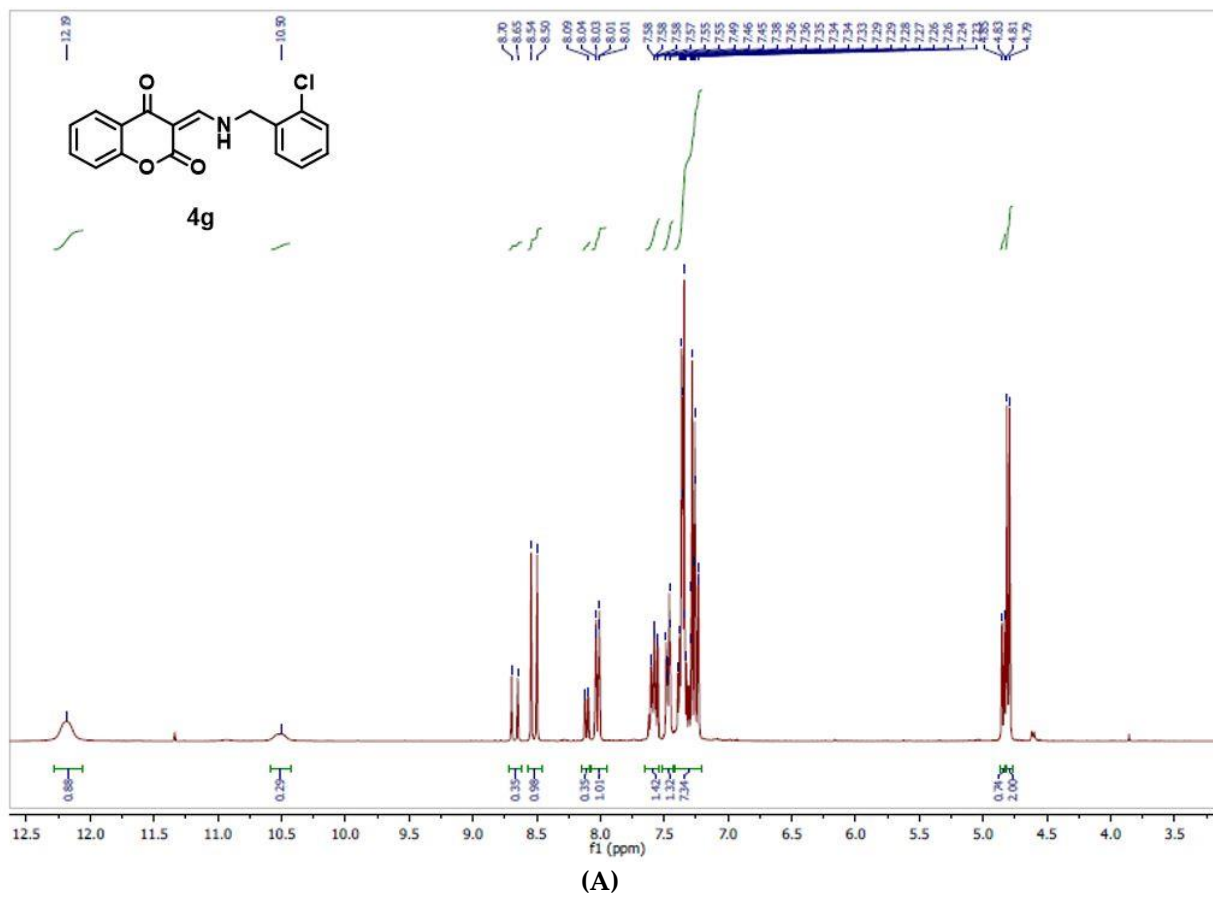

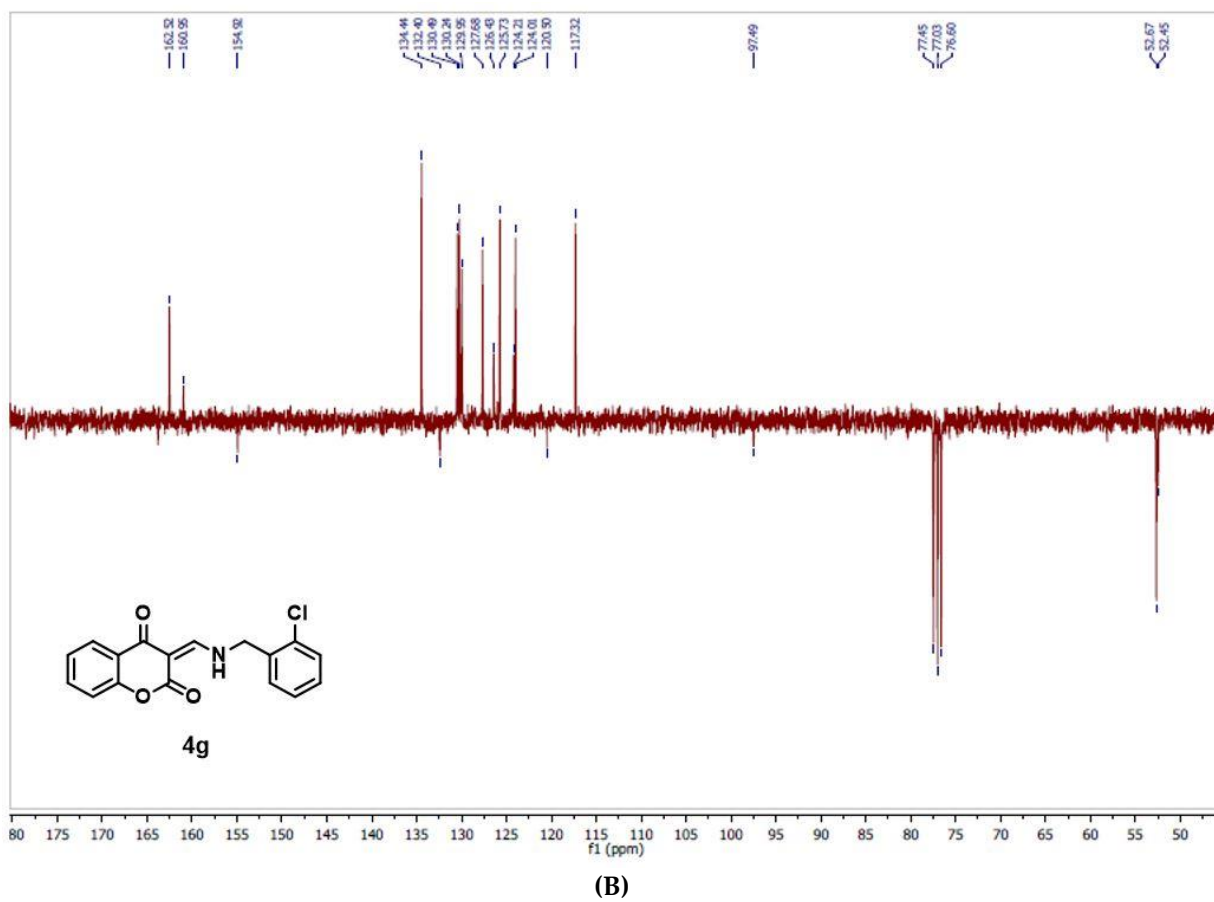

**Figure S7.** (A)  $^1\text{H}$ -NMR spectrum of **4g**. (B)  $^{13}\text{C}$ -NMR spectrum of **4g**.

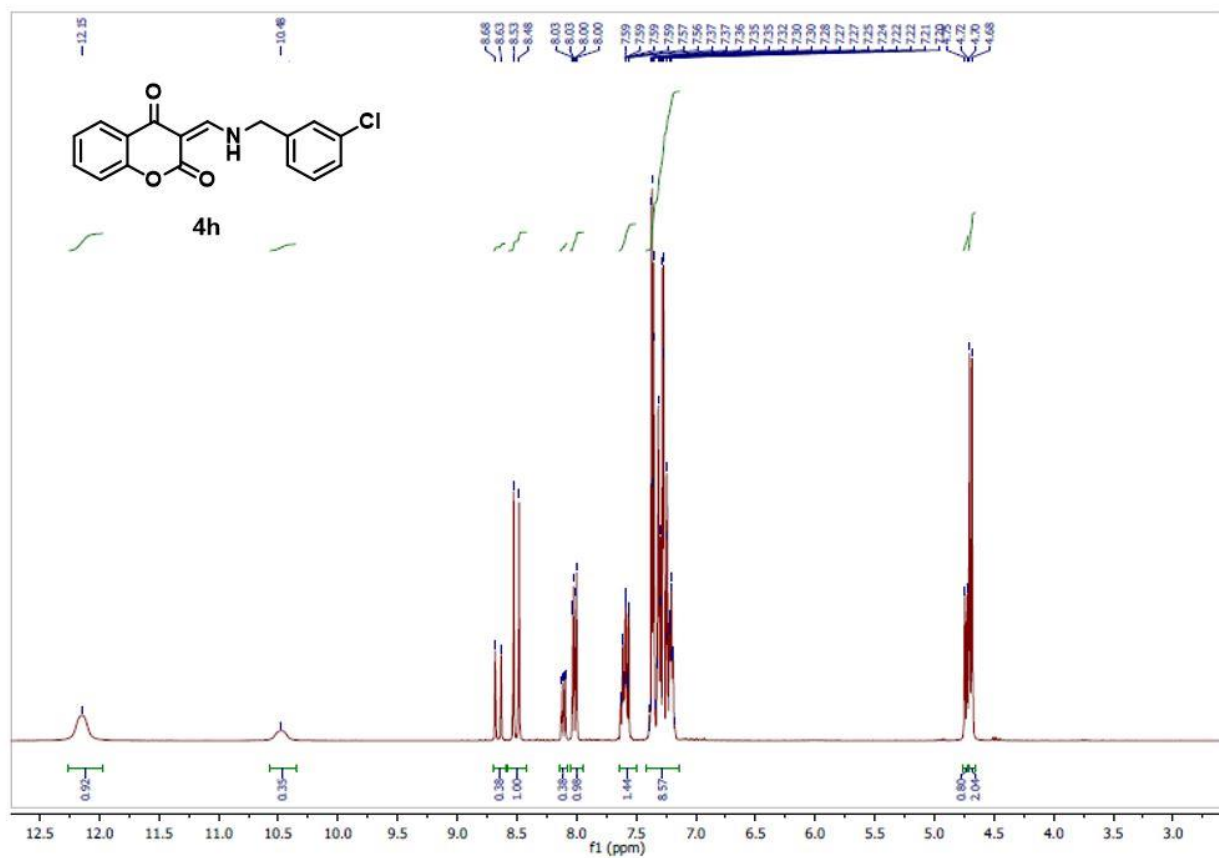

(A)

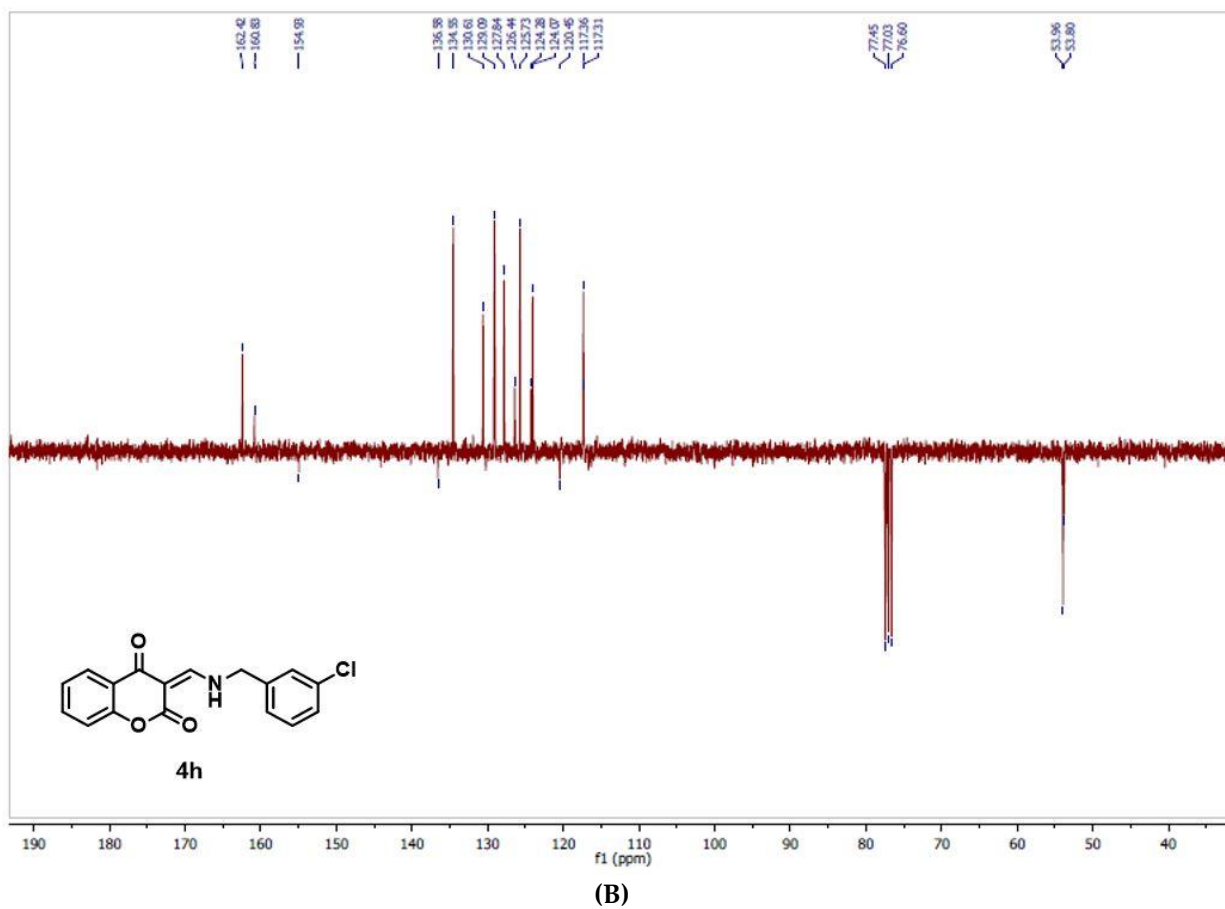

**Figure S8.** (A)  $^1\text{H}$ -NMR spectrum of **4h**. (B)  $^{13}\text{C}$ -NMR spectrum of **4h**.





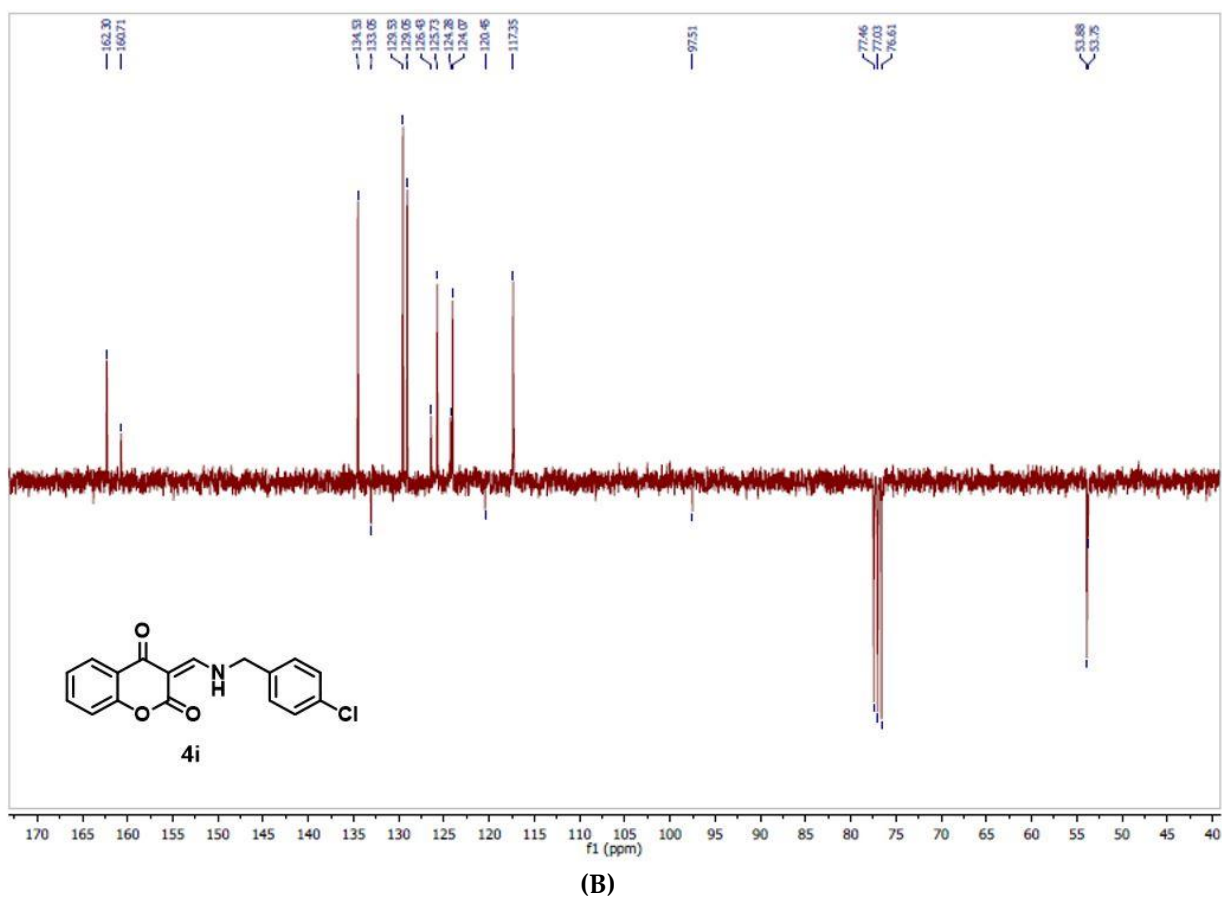

**Figure S9.** (A)  $^1\text{H}$ -NMR spectrum of **4i**. (B)  $^{13}\text{C}$ -NMR spectrum of **4i**.

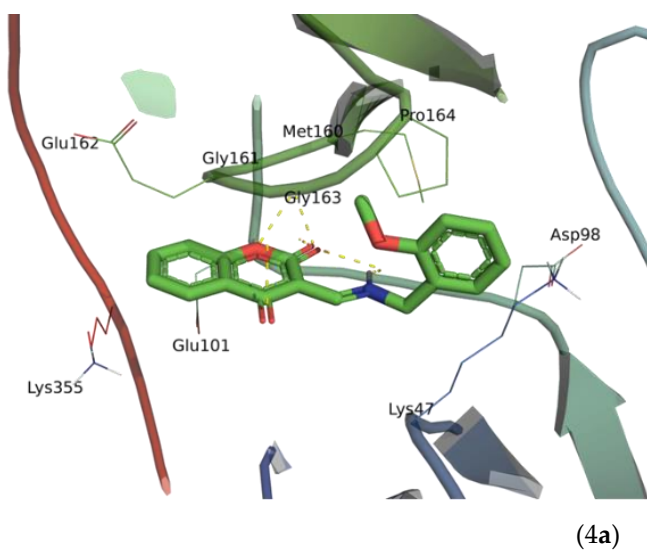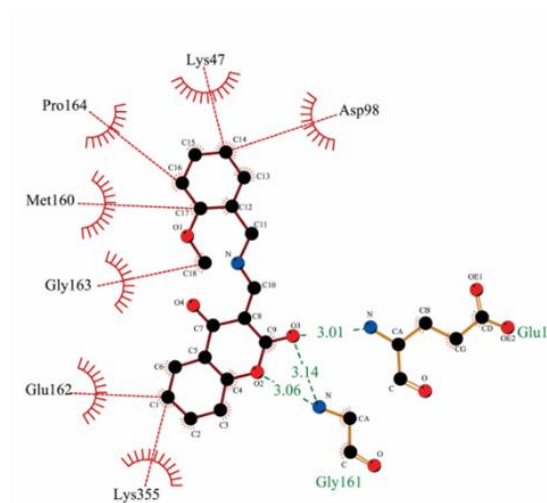

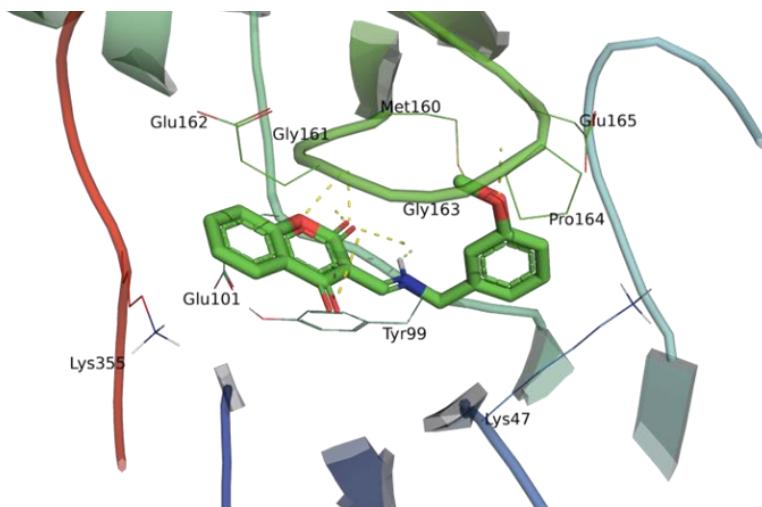

(4b)

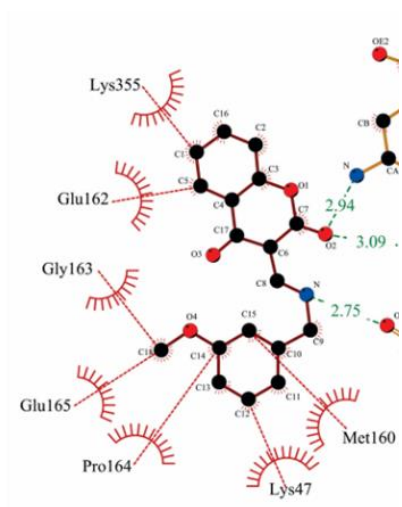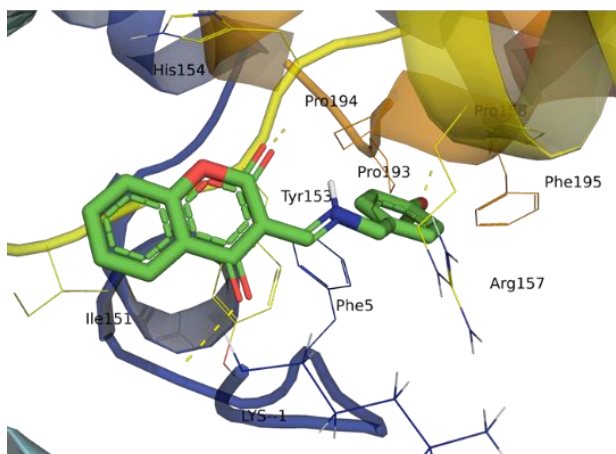

(4c)

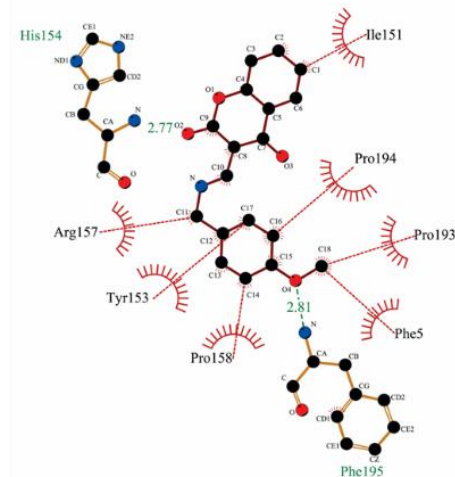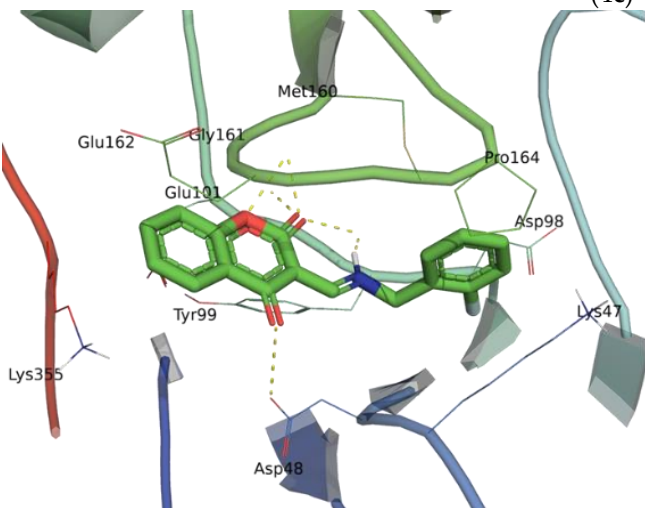

(4d)

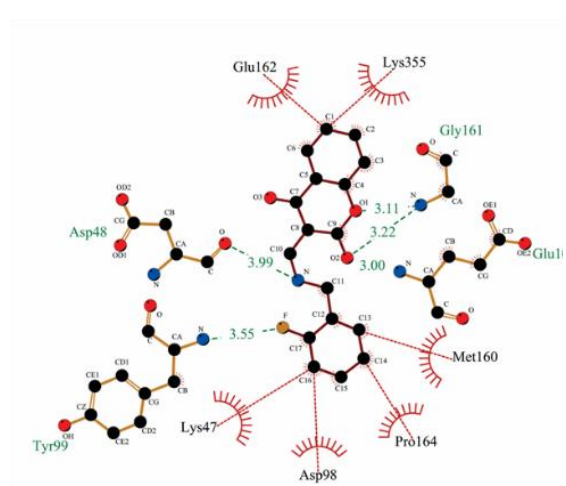

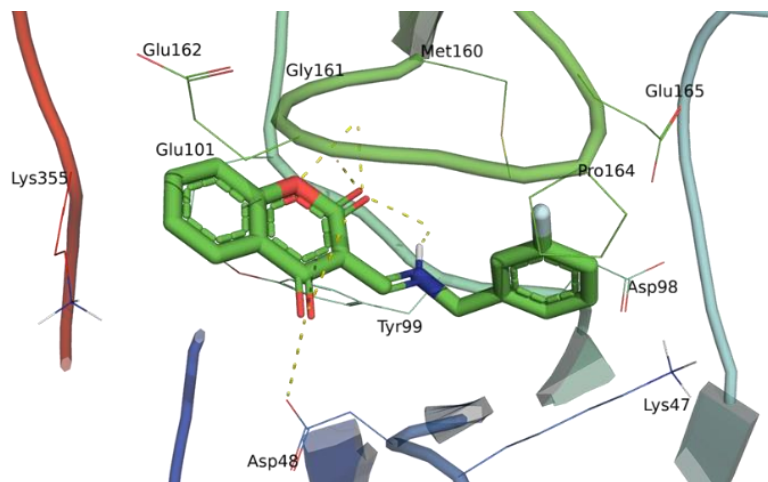

(4e)

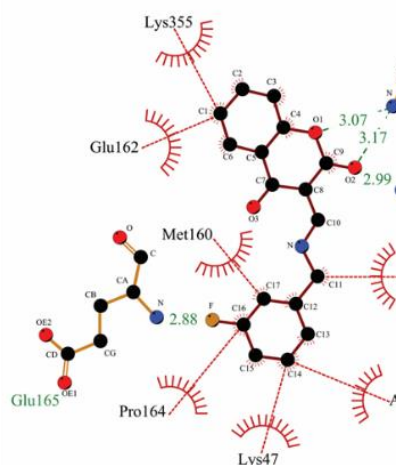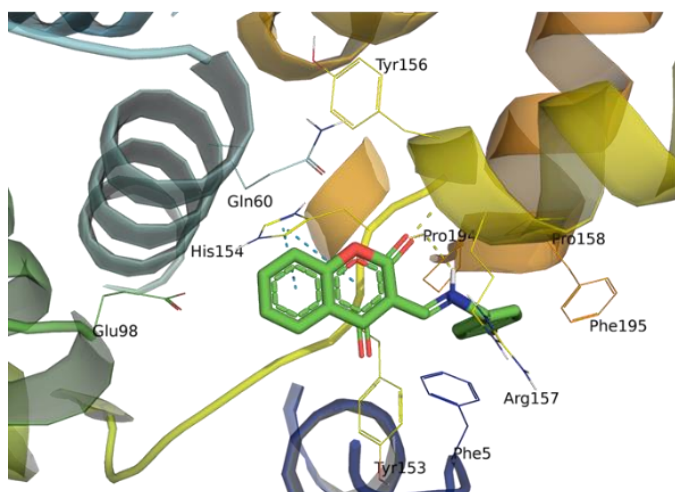

(4f)

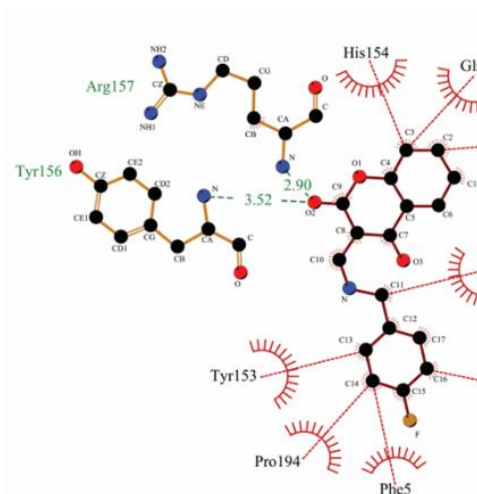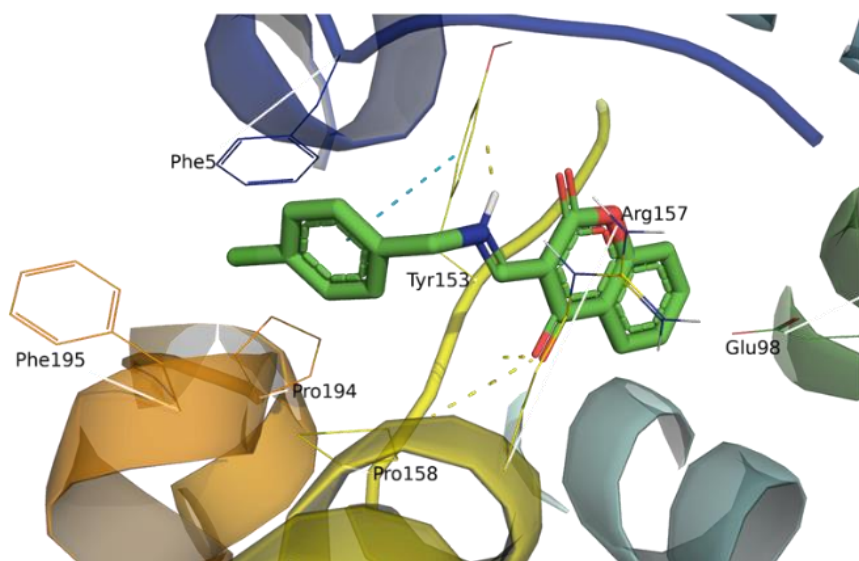

(4g)

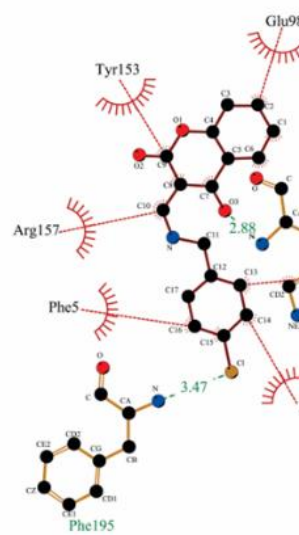

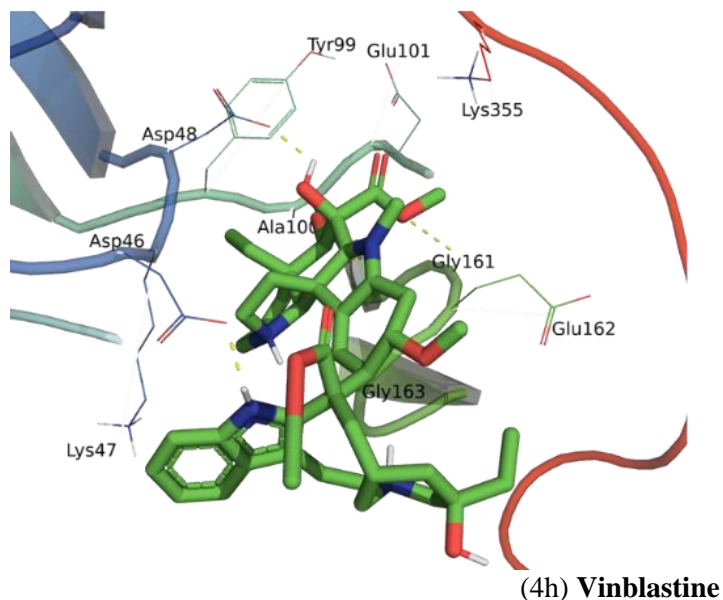

(4h) Vinblastine

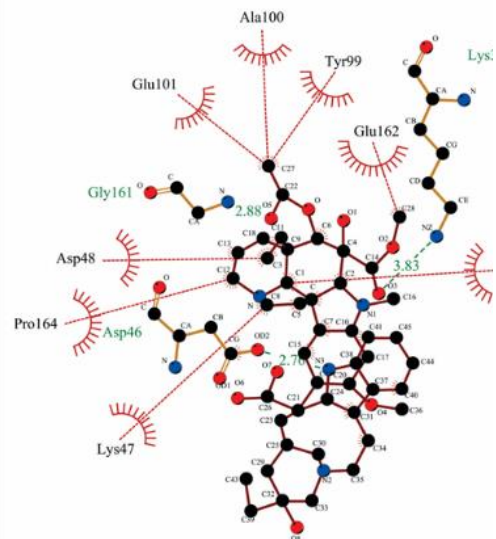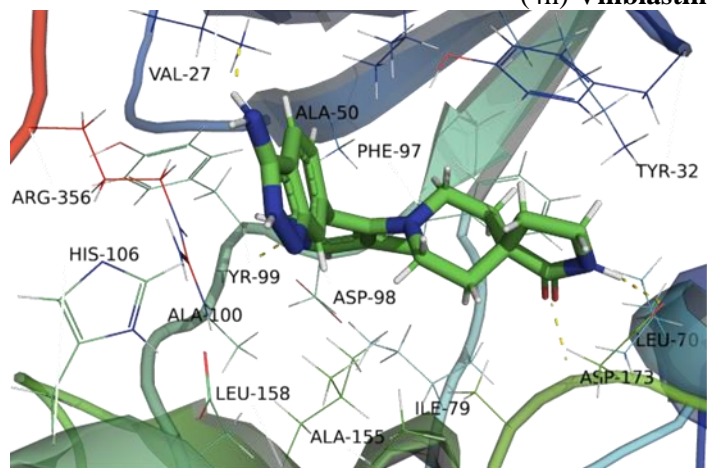

(4i) Native ligand (5XG) of CDK-8

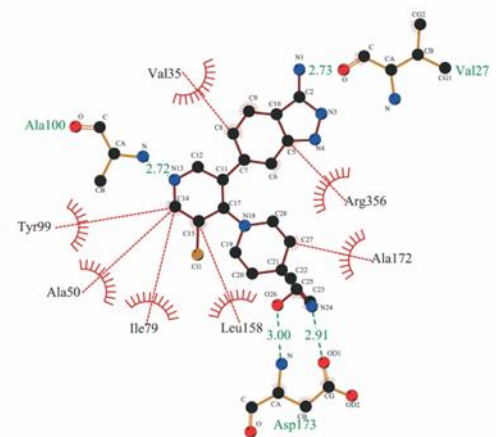

**Figure S10.** Docking Simulations of Compounds (4a-i, Vinblastine and native ligand) with CDK-8 protein.
